# Supplementary material
Source: publisher site journal article supplement (https://www.dovepress.com/get_supplementary_file.php?f=328824.docx)
Supplement: Supplementary file 1 [file get_supplementary_file.php]

**Supplementary material**

**Questionnaire used to ask information from the patients.**

1. Could you please tell me from where does you come from and your age?

Address________________ Age___________________

1. Is there any medical problem in the past that you seek for treatment in the hospital/health care? Yes______ No_________

If yes, would you please tell me the list?

_________________________________________________________________________________________________________________________________________________________________________________________

1. A. Did you have taken any medications before you come to this hospital? If so, what are those drugs?

________________________________________________________________________________________________________________________________________________________________________________

B. While you were taking medications in the past, did you have any previous drug reactions/any allergic history to medications or food that you noted or you have been told by health professionals previously?

__________________________________________________________________________________________________________________________________________________________________________________

1. While you are here:
2. Is there any new problem that you have encountered after you started to take your medications prescribed for your illness in the hospital after admissions?

_________________________________________________________________________________________________________________________________________________________________________________________________

1. Is there any error that you noted in regards to medications you are currently taking that reached you or intercepted before reaching you? If so, could you explain to me?

__________________________________________________________________________________________________________________________________________________________________________________________________
